# Supplementary material for: Clinical models for predicting the association between dietary oxidative balance score and sarcopenia
Source: Research Square preprint supplement (doi:10.21203/rs.3.rs-7084098/v1), 2025-10-15
Supplement: Supplementary file 1 [file 939c8f1498331c5064849909.docx]

**Supplement Table 2**. Characteristics by quartile of the DOBS.

| **Characteristic** | **Dietary Oxidative Balance Score** | | | | ***P*** |
| --- | --- | --- | --- | --- | --- |
|  | **Q1** | **Q2** | **Q3** | **Q4** |  |
|  | **N=2339** | **N=2744** | **N=2891** | **N=2758** |  |
| **Arthritis,(%)** |  |  |  |  | <0.001* |
| Yes | 20.18 | 19.24 | 21.06 | 19.64 |  |
| Borderline | 28.71 | 24.63 | 18.81 | 13.55 |  |
| **Arthritis kind,(%)** |  |  |  |  | 0.115 |
| Osteoarthritis or degenerative arthritis | 8.79 | 10.83 | 11.41 | 10.99 |  |
| Rheumatoid Arthritis | 4.01 | 2.64 | 3.14 | 2.28 |  |
| Psoriatic arthritis | 0.21 | 0.19 | 0.54 | 0.23 |  |
| Borderline | 86.99 | 86.34 | 84.91 | 86.5 |  |
| **Heart Disease,(%)** |  |  |  |  | <0.001* |
| Yes | 2.92 | 3.64 | 2.75 | 1.74 |  |
| Borderline | 28.49 | 24.66 | 18.8 | 13.51 |  |
| **Liver Disease,(%)** |  |  |  |  | <0.001* |
| Yes | 2.47 | 2.33 | 2.55 | 2.98 |  |
| Borderline | 28.44 | 24.66 | 18.89 | 13.53 |  |
| **Cotinine** | 64.68 | 49.35 | 36.87 | 28.50 | <0.001* |

Mean + SD for continuous variables: the P-value was calculated by the weighted linear regression model. (%) for categorical variables: the P-value was calculated by the weighted chi- square test.Q, quartile; BMI, body mass index.
