# Supplementary material for: Clinical models for predicting the association between dietary oxidative balance score and sarcopenia
Source: Research Square preprint supplement (doi:10.21203/rs.3.rs-7084098/v1), 2025-10-15
Supplement: Supplementary file 2 [file 99aaf80fc7d91767bd71e158.docx]

**Supplementary Table 3.** Characteristics in training and validation cohorts.

| Variables | Total (n = 10732) | test (n = 3220) | train (n = 7512) | *P* |
| --- | --- | --- | --- | --- |
|
| Sex,(%) |  |  |  | 0.304 |
| Male | 5218 (48.62) | 1590 (49.38) | 3628 (48.30) |  |
| Female | 5514 (51.38) | 1630 (50.62) | 3884 (51.70) |  |
| Sarcopenia (%) |  |  |  | 0.435 |
| Yes | 2250 (20.97) | 660 (20.50) | 1590 (21.17) |  |
| No | 8482 |  |  |  |
| DOBS, n(%) |  |  |  | 0.998 |
| Q1 | 2339 (21.79) | 701 (21.77) | 1638 (21.81) |  |
| Q2 | 2744 (25.57) | 824 (25.59) | 1920 (25.56) |  |
| Q3 | 2891 (26.94) | 871 (27.05) | 2020 (26.89) |  |
| Q4 | 2758 (25.70) | 824 (25.59) | 1934 (25.75) |  |
| Age, n(%) |  |  |  | 0.821 |
| <50 | 7259 (67.64) | 2183 (67.80) | 5076 (67.57) |  |
| >=50 | 3473 (32.36) | 1037 (32.20) | 2436 (32.43) |  |
| Race, n(%) |  |  |  | 0.210 |
| Mexican American | 777 (7.24) | 210 (6.52) | 567 (7.55) |  |
| Other Hispanics | 603 (5.62) | 166 (5.16) | 437 (5.82) |  |
| Non-Hispanic white | 3173 (29.57) | 960 (29.81) | 2213 (29.46) |  |
| African-American | 1664 (15.51) | 510 (15.84) | 1154 (15.36) |  |
| Other race | 4515 (42.07) | 1374 (42.67) | 3141 (41.81) |  |
| Kidney disease, n(%) |  |  |  | 0.183 |
| Yes | 216 (2.01) | 77 (2.39) | 139 (1.85) |  |
| No | 6996 (65.19) | 2086 (64.78) | 4910 (65.36) |  |
| Na | 3520 (32.80) | 1057 (32.83) | 2463 (32.79) |  |
| Arthritis, n(%) |  |  |  | 0.955 |
| Na | 3522 (32.82) | 1055 (32.76) | 2467 (32.84) |  |
| Yes | 1855 (17.28) | 552 (17.14) | 1303 (17.35) |  |
| No | 5355 (49.90) | 1613 (50.09) | 3742 (49.81) |  |
| Arthritis kind, n(%) |  |  |  | 0.907 |
| Na | 9549 (88.98) | 2868 (89.07) | 6681 (88.94) |  |
| Osteoarthritis or degenerative arthritis | 845 (7.87) | 255 (7.92) | 590 (7.85) |  |
| Rheumatoid arthritis | 314 (2.93) | 89 (2.76) | 225 (3.00) |  |
| Psoriatic arthritis | 24 (0.22) | 8 (0.25) | 16 (0.21) |  |
| Heart disease, n(%) |  |  |  | 0.464 |
| Yes | 281 (2.62) | 75 (2.33) | 206 (2.74) |  |
| No | 6933 (64.60) | 2090 (64.91) | 4843 (64.47) |  |
| Na | 3518 (32.78) | 1055 (32.76) | 2463 (32.79) |  |
| Liver disease, n(%) |  |  |  | 0.782 |
| Yes | 276 (2.57) | 88 (2.73) | 188 (2.50) |  |
| No | 6936 (64.63) | 2075 (64.44) | 4861 (64.71) |  |
| Na | 3520 (32.80) | 1057 (32.83) | 2463 (32.79) |  |
| Cotinine, n(%) |  |  |  | 0.029 |
| No | 8026 (74.79) | 2453 (76.18) | 5573 (74.19) |  |
| Yes | 2706 (25.21) | 767 (23.82) | 1939 (25.81) |  |
| BMI, n(%) |  |  |  | 0.840 |
| <30 | 7698 (71.73) | 2314 (71.86) | 5384 (71.67) |  |
| >=30 | 3034 (28.27) | 906 (28.14) | 2128 (28.33) |  |
