# Supplementary material for: Clinical models for predicting the association between dietary oxidative balance score and sarcopenia
Source: Research Square preprint supplement (doi:10.21203/rs.3.rs-7084098/v1), 2025-10-15
Supplement: Supplementary file 3 [file d363acf6b98eaf254adc9dff.docx]

| **OBS** | **Sarcopenia** | |
| --- | --- | --- |
| **OBS original model 3** | **OR(95%CI)** | ***P*** |
| OBS excluding dietary fiber | 0.963(0.949,0.977) | <0.001 |
| OBS excluding carotene | 0.964(0.950,0.978) | <0.001 |
| OBS excluding riboflavin | 0.963(0.949,0.977) | <0.001 |
| OBS excluding niacin | 0.965(0.951,0.980) | <0.001 |
| OBS excluding vitam in b6 | 0.964(0.950,0.979) | <0.001 |
| OBS excluding total folate | 0.963(0.949,0.978) | <0.001 |
| OBS excluding vitam in b12 | 0.963(0.949,0.977) | <0.001 |
| OBS excluding vitam in c | 0.962(0.949,0.976) | <0.001 |
| OBS excluding vitam in e | 0.965(0.950,0.980) | <0.001 |
| OBS excluding calcium | 0.963(0.949,0.977) | <0.001 |
| OBS excluding magnesium | 0.965(0.951,0.979) | <0.001 |
| OBS excluding zinc | 0.964(0.949,0.979) | <0.001 |
| OBS excluding copper | 0.964(0.949,0.978) | <0.001 |
| OBS excluding selenium | 0.965(0.951,0.980) | <0.001 |
| OBS excluding total fat | 0.967(0.955,0.980) | <0.001 |
| OBS excluding iron | 0.969(0.957,0.981) | <0.001 |

**Supplementary Table 1.** Sensitivity analyses to assess the effects of individual OBS components on the sleep.

The model 3 was adjusted by sex, age, race, kidney disease, arthritis, arthritiskind, heart disease, liver disease, BMI. OR, odds ratio; CI, confidence intervals.
